# Supplementary material for: Propionate Induces Virulent Properties of Crohn’s Disease-Associated Escherichia coli
Source: PubMed Central journal article supplement (PMC7360682; doi:10.3389/fmicb.2020.01460), 2020-07-08
Supplement: Data_Sheet_1.pdf [file Data_Sheet_1.pdf]

Table S1. List of primers

| Name                                  | Sequence                 |
|---------------------------------------|--------------------------|
| Primers for qRT-PCR                   |                          |
| prpB_F                                | GCGCCATGATCACAAAATC      |
| prpB_R                                | GAAATCGATGATTAAAGCCGGTG  |
| prpC_F                                | CATTGCGAATTTGAAGAAGTGG   |
| prpC_R                                | GTTTGTCTGGCAATATCCCGCG   |
| prpD_F                                | AAATGTGCTGTTCAAATCTCC    |
| prpD_R                                | TAATCTGCCGCCGTTAAGC      |
| prpE_F                                | GATGTATGGCTATAACGTGCAG   |
| prpE_R                                | GAGATACTCTCTTCAATCTCGC   |
| prpR_F                                | CGGCTTCTTCTGCCAGATC      |
| prpR_R                                | GATGTGTTACAGGCACTGGC     |
| acs_F                                 | CATGTGGTGGTACTGAAGCGTAC  |
| acs_R                                 | CTTCAAACATCAGCGTGGTCGC   |
| cobB_F                                | AGAAATTCAGCCTAACGCCG     |
| cobB_R                                | ATCCATGCCGAGTGGCATTTC    |
| pta_F                                 | CGGTTGATGAACAGGGTCGT     |
| pta_R                                 | CTTCGTTGATGATGGTCGCAT    |
| gyrA_F ( <i>reference gene</i> )      | TGGTGACGTAATCGGTAAATACCA |
| gyrA_R ( <i>reference gene</i> )      | GTTATCAACGAAATCGACCGTC   |
| Primers for PCR and Sanger sequencing |                          |
| acs_check_F                           | TTGTGGGTTACGATGGCATCG    |
| acs_check_R                           | CTACATTTAACGCTTATGCCAC   |
| cobB_check_F                          | AACAGAGGTTGCTATGCTGTC    |
| cobB_check_R                          | TGATAAGCGTAGTGCATCAGG    |
| prpE_check_F                          | GTAAGGCGTAAGTTCAACAGG    |
| prpE_check_R                          | GCATCCGACAATAACCTACTC    |
| prpR_check_F                          | GGATAAAGCGTTCGCGCTGC     |
| prpR_check_R                          | GCGTTTCAGTTAACGTTTCAGGC  |
| prpC_check_F                          | CCGGAACGCCAGAAAGTGC      |
| prpC_check_R                          | GAAATCGATGATTAAAGCCGGTG  |

Table S2 Cq values for qRT-PCR efficiency test

| Cq_rep1     | Cq_rep2 | Mean_Cq | SD   | Dilution | Log2Dilution | Efficiency(%) |
|-------------|---------|---------|------|----------|--------------|---------------|
| <i>acs</i>  |         |         |      |          |              |               |
| 22.71       | 22.67   | 22.69   | 0.03 | 1        | 0            | 97.88         |
| 23.95       | 23.74   | 23.84   | 0.15 | 2        | -1           |               |
| 25.03       | 24.81   | 24.92   | 0.15 | 4        | -2           |               |
| 25.96       | 26.02   | 25.99   | 0.04 | 8        | -3           |               |
| 26.77       | 26.79   | 26.78   | 0.02 | 16       | -4           |               |
| <i>cobB</i> |         |         |      |          |              |               |
| 22.45       | 22.47   | 22.46   | 0.01 | 1        | 0            | 101.16        |
| 23.47       | 23.43   | 23.45   | 0.03 | 2        | -1           |               |
| 24.78       | 24.63   | 24.70   | 0.11 | 4        | -2           |               |
| 25.29       | 25.51   | 25.40   | 0.15 | 8        | -3           |               |
| 26.50       | 26.30   | 26.40   | 0.14 | 16       | -4           |               |
| <i>pta</i>  |         |         |      |          |              |               |
| 21.95       | 21.98   | 21.97   | 0.02 | 1        | 0            | 97.56         |
| 22.82       | 22.98   | 22.90   | 0.11 | 2        | -1           |               |
| 23.66       | 24.00   | 23.83   | 0.24 | 4        | -2           |               |
| 25.04       | 25.35   | 25.19   | 0.22 | 8        | -3           |               |
| 25.95       | 26.06   | 26.00   | 0.08 | 16       | -4           |               |
| <i>prpB</i> |         |         |      |          |              |               |
| 22.29       | 22.31   | 22.30   | 0.01 | 1        | 0            | 100.32        |
| 23.60       | 23.26   | 23.43   | 0.24 | 2        | -1           |               |
| 24.84       | 24.27   | 24.55   | 0.40 | 4        | -2           |               |
| 25.37       | 25.34   | 25.35   | 0.02 | 8        | -3           |               |
| 26.18       | 26.46   | 26.32   | 0.19 | 16       | -4           |               |
| <i>prpC</i> |         |         |      |          |              |               |
| 20.01       | 20.04   | 20.02   | 0.02 | 1        | 0            | 103.60        |
| 20.94       | 20.77   | 20.86   | 0.12 | 2        | -1           |               |
| 22.01       | 21.76   | 21.88   | 0.18 | 4        | -2           |               |
| 22.90       | 23.02   | 22.96   | 0.09 | 8        | -3           |               |
| 23.57       | 23.88   | 23.73   | 0.22 | 16       | -4           |               |
| <i>prpD</i> |         |         |      |          |              |               |
| 19.88       | 19.91   | 19.89   | 0.02 | 1        | 0            | 98.03         |
| 21.18       | 20.79   | 20.98   | 0.27 | 2        | -1           |               |
| 22.02       | 21.73   | 21.88   | 0.21 | 4        | -2           |               |
| 22.98       | 22.81   | 22.90   | 0.12 | 8        | -3           |               |
| 24.05       | 24.12   | 24.09   | 0.04 | 16       | -4           |               |
| <i>prpE</i> |         |         |      |          |              |               |
| 23.04       | 22.77   | 22.90   | 0.19 | 1        | 0            | 98.13         |
| 24.03       | 23.58   | 23.80   | 0.32 | 2        | -1           |               |
| 24.82       | 25.05   | 24.93   | 0.16 | 4        | -2           |               |
| 25.74       | 26.02   | 25.88   | 0.20 | 8        | -3           |               |
| 26.81       | 27.20   | 27.01   | 0.28 | 16       | -4           |               |

| <i>prpR</i>                  |       |       |      |    |    |        |
|------------------------------|-------|-------|------|----|----|--------|
| 22.32                        | 22.29 | 22.30 | 0.02 | 1  | 0  | 104.37 |
| 23.21                        | 23.05 | 23.13 | 0.11 | 2  | -1 |        |
| 23.91                        | 24.16 | 24.03 | 0.17 | 4  | -2 |        |
| 25.14                        | 25.21 | 25.18 | 0.05 | 8  | -3 |        |
| 25.99                        | 25.99 | 25.99 | 0.01 | 16 | -4 |        |
| <i>gyrA (reference gene)</i> |       |       |      |    |    |        |
| 20.96                        | 20.88 | 20.92 | 0.03 | 1  | 0  | 96.76  |
| 22.18                        | 21.74 | 21.96 | 0.16 | 2  | -1 |        |
| 22.99                        | 22.73 | 22.86 | 0.09 | 4  | -2 |        |
| 24.16                        | 23.85 | 24.01 | 0.11 | 8  | -3 |        |
| 25.23                        | 25.06 | 25.14 | 0.06 | 16 | -4 |        |

SD – standard deviation

PCR primer efficiency was calculated as

$$\text{Efficiency (\%)} = (2^{-1/\text{slope value}} - 1) * 100$$

This data was used to plot standard curves and calculate qRT-PCR efficiency for each primer pairs

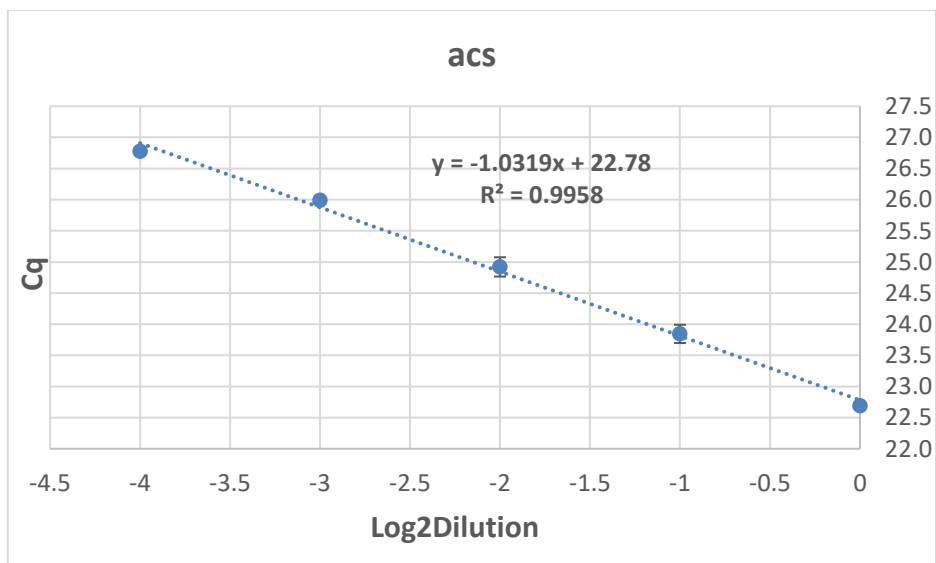

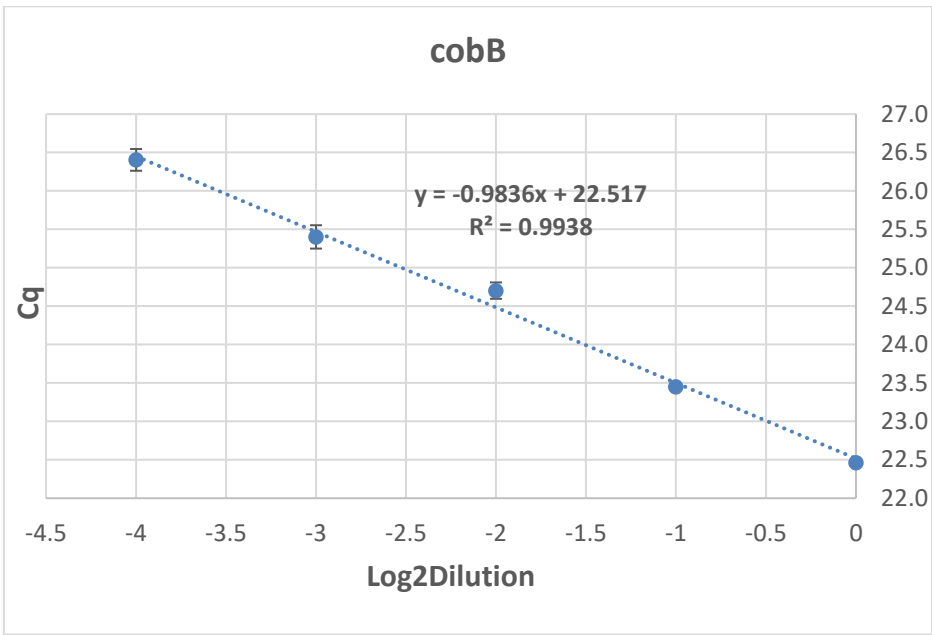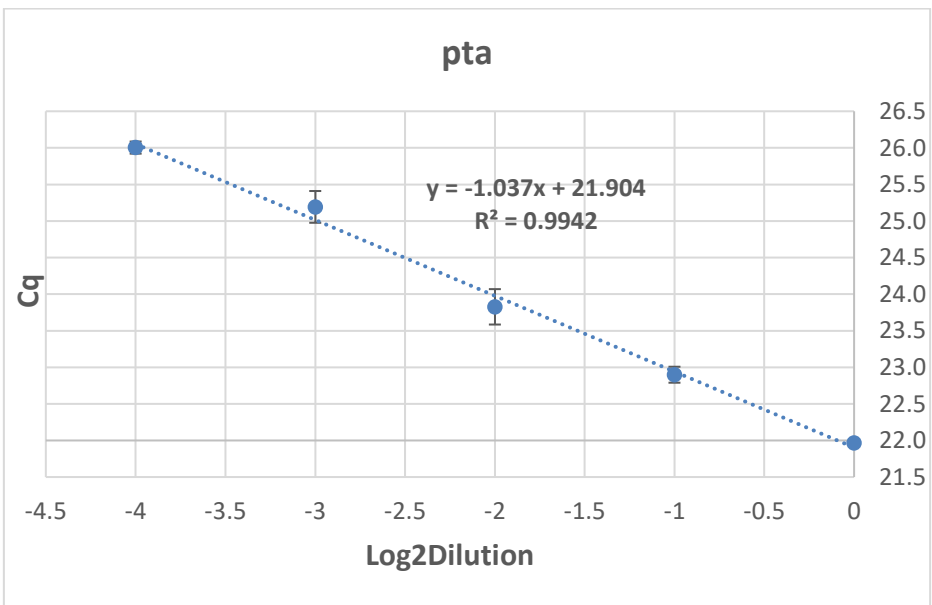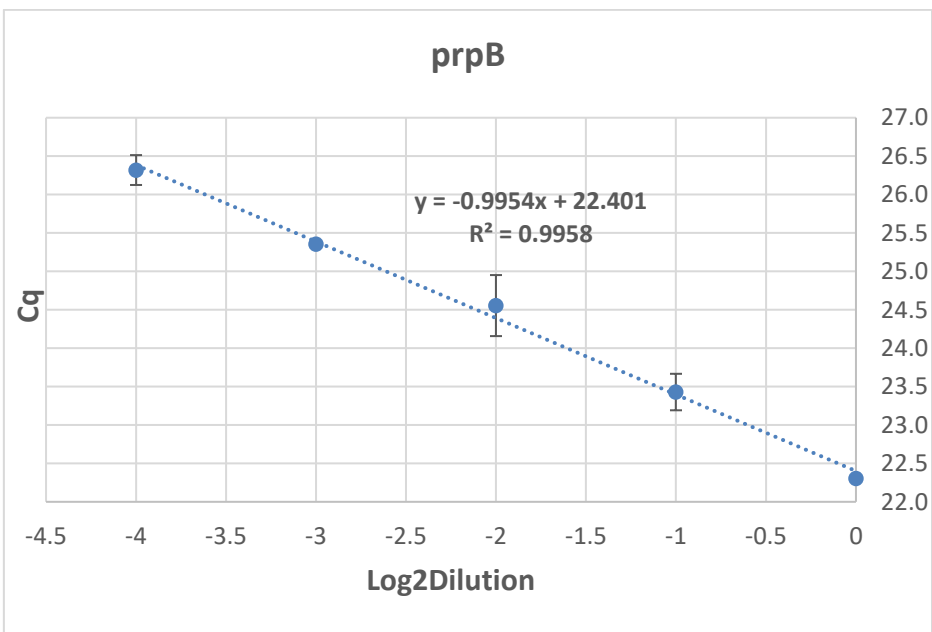

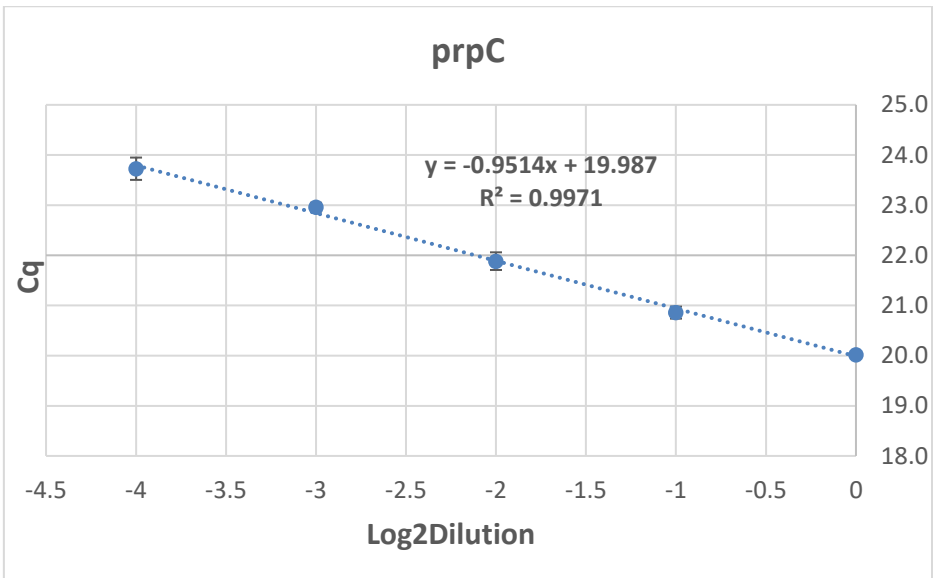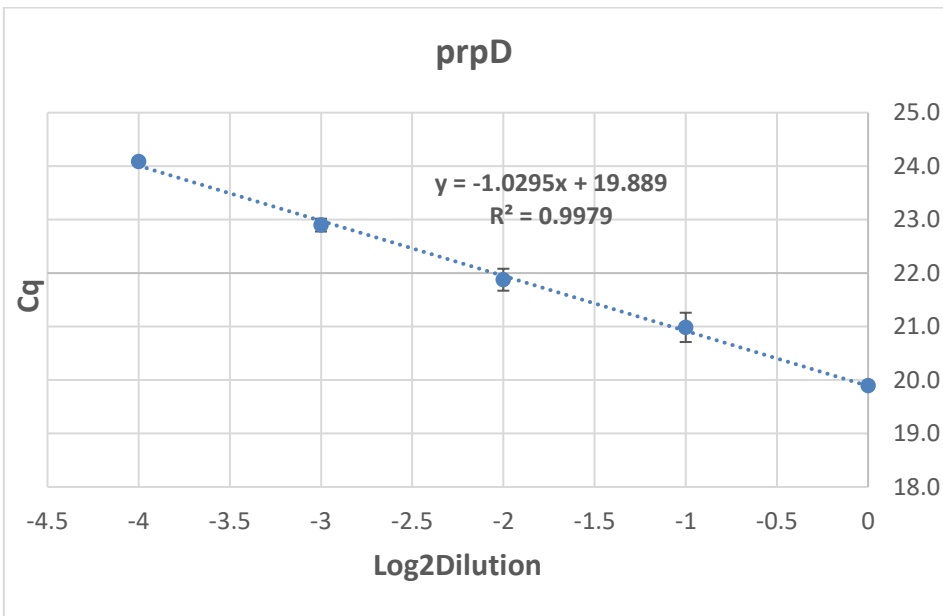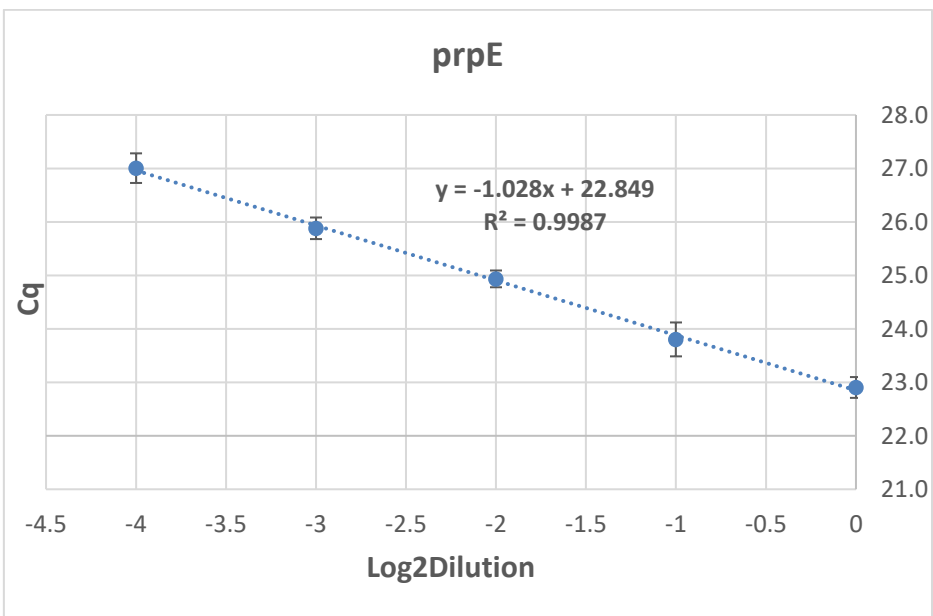

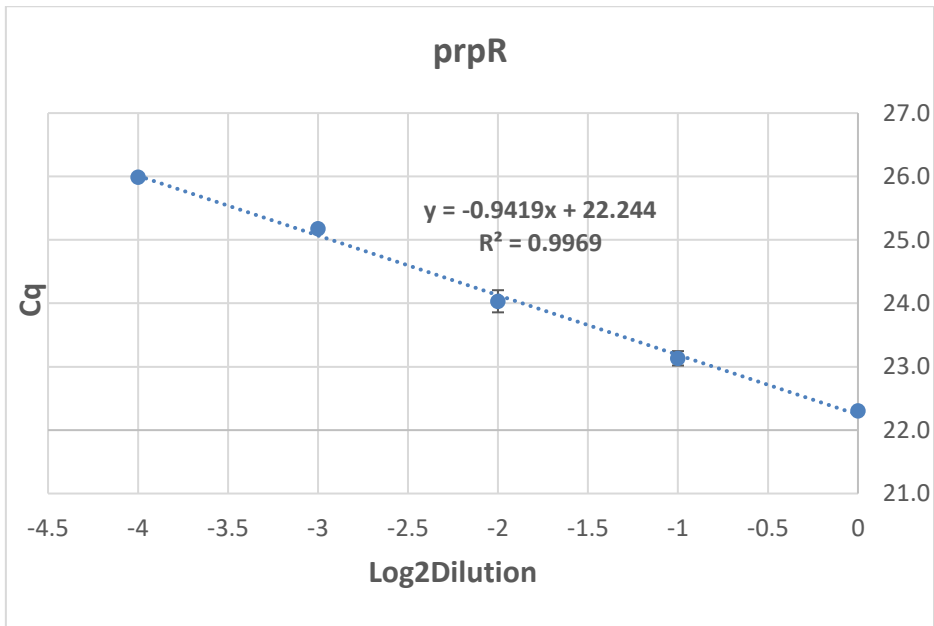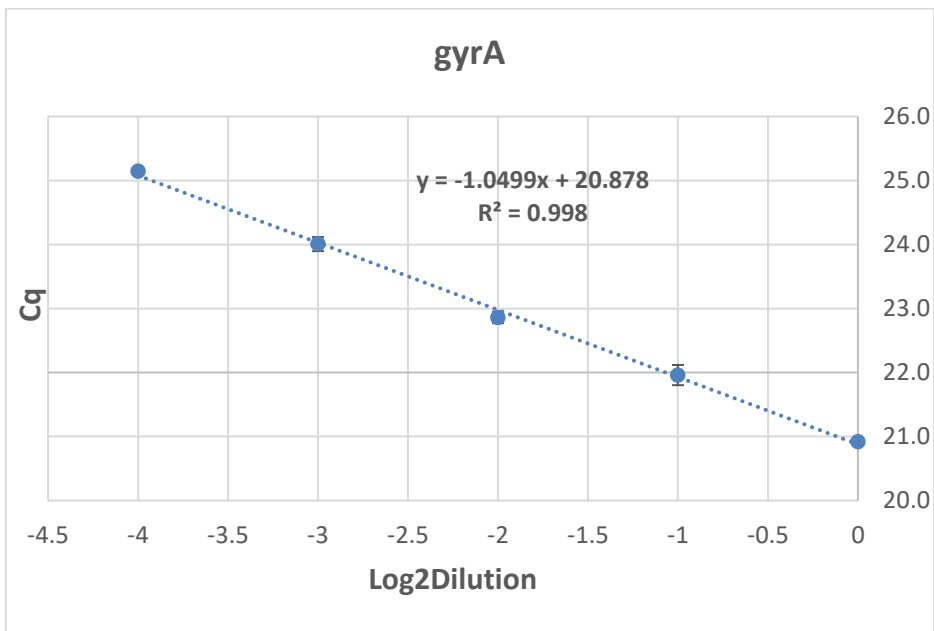

Figure S1 Standard curves for qRT-PCR efficiency

We used R package Growthcurver (Sprouffske K, Wagner A. Growthcurver: an R package for obtaining interpretable metrics from microbial growth curves. BMC Bioinformatics 17, 172 (2016).) for fitting growth curve data by the standard logistic equation common in ecology and evolution (Crow JF, Kimura M. An Introduction to Population Genetics Theory. Caldwell, NJ: Harper and Row, Publishers, Inc.; 1970), (Rockwood LL. Introduction to Population Ecology, 2nd ed. West Sussex: Wiley; 2015). (Figure S1).

The logistic equation gives the number of cells  $N_t$  at time  $t$ :

$$N_t = \frac{k}{1 + \left(\frac{k - n_0}{n_0}\right)e^{-rt}}$$

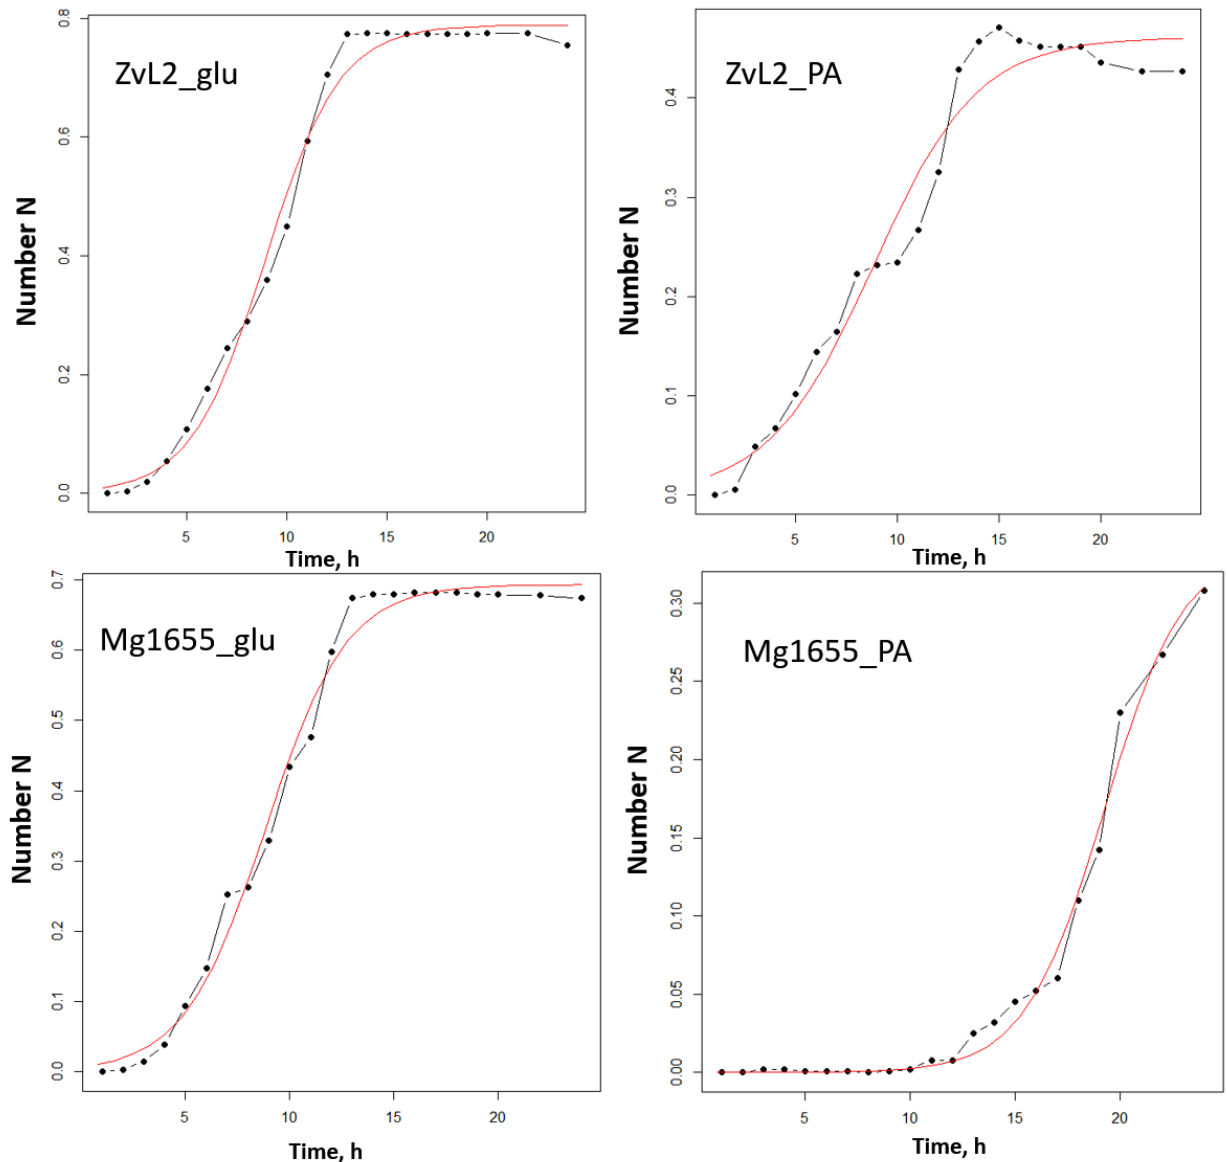

Figure S2. The plot of the raw growth curve data and the best fit logistic curve for ZvL2 isolate (ZvL2) and laboratory strain *E.coli* K12 MG1655 (Mg1655) cultivated on M9 minimal medium with the addition of glucose (Glu) or sodium propionate (PA).

We extracted the value of arguments for all fitting curves (Table S2)

Table S3. The value of arguments

| Arguments | Samples  |          |            |           |
|-----------|----------|----------|------------|-----------|
|           | ZvL2 glu | ZvL2 PA  | Mg1655 glu | Mg1655 PA |
| k         | 0.789    | 0.461    | 0.693      | 0.335     |
| k_se      | 0.0117   | 0.0147   | 0.0103     | 0.0162    |
| k_p       | 4.42E-24 | 7.54E-18 | 4.19E-24   | 1.85E-14  |
| n0        | 0.00632  | 0.01470  | 0.00717    | 0.00001   |
| n0_se     | 0.0021   | 0.00556  | 0.00218    | 1.03E-05  |
| n0_p      | 0.00733  | 0.0163   | 0.00383    | 0.251     |
| r         | 0.541    | 0.389    | 0.516      | 0.531     |
| r_se      | 0.0383   | 0.0465   | 0.0354     | 0.0475    |
| r_p       | 1.59E-11 | 8.62E-08 | 8.99E-12   | 8.48E-10  |
| sigma     | 0.0308   | 0.0321   | 0.0265     | 0.0102    |
| df        | 19       | 19       | 19         | 19        |
| t_mid     | 8.9      | 8.79     | 8.83       | 19.2      |
| t_gen     | 1.28     | 1.78     | 1.34       | 1.3       |
| auc_l     | 11.9     | 6.98     | 10.5       | 1.65      |
| auc_e     | 11.9     | 6.92     | 10.5       | 1.68      |
| note      |          |          |            |           |

#### Description of the arguments

- k The carrying capacity parameter
- k\_se The standard error of the carrying capacity parameter
- k\_p The p value of the carrying capacity parameter
- n0 The initial population size
- n0\_se The standard error of the initial population size
- n0\_p The p value of the initial population size
- r The growth rate
- r\_se The standard error of the growth rate
- r\_p The p value of the growthrate
- sigma Residual standard error from non-linear least squares fit of the model to the data
- df Degrees of freedom
- t\_mid The time at the inflection point of the logistic curve (occurs at half of the carrying capacity)
- t\_gen The maximum doubling time, obtained by evaluating the the unrestrained growth of the population with growth rate r
- auc\_l The area under the curve of the fitted logistic equation from time 0 to time t
- auc\_e The area under the curve of the measurements.
- note Feedback on common problems with fitting the logistic curve to the data



Table S4. Adjusted P-values for pairwise comparison of all groups in each experiment

| Caco2. adherence |            |                |           |          |              |          |
|------------------|------------|----------------|-----------|----------|--------------|----------|
|                  | Mg1655 Glu | Mg1655 initial | Mg1655 PA | ZvL2 Glu | ZvL2 initial | ZvL2 PA  |
| Mg1655 initial   | 1.59E-02   | -              | -         | -        | -            | -        |
| Mg1655 PA        | 6.15E-03   | 9.10E-04       | -         | -        | -            | -        |
| ZvL2 Glu         | 2.65E-01   | 9.45E-01       | 5.03E-02  | -        | -            | -        |
| ZvL2 initial     | 1.56E-02   | 6.25E-02       | 6.15E-03  | 1.04E-01 | -            | -        |
| ZvL2 PA          | 7.30E-04   | 9.10E-04       | 7.30E-04  | 2.04E-03 | 2.65E-02     | -        |
| ZvL2 PA-Glu      | 5.46E-01   | 6.15E-03       | 2.69E-03  | 2.02E-01 | 1.42E-02     | 7.30E-04 |

| Caco2. invasion |            |                |           |          |              |          |
|-----------------|------------|----------------|-----------|----------|--------------|----------|
|                 | Mg1655 Glu | Mg1655 initial | Mg1655 PA | ZvL2 Glu | ZvL2 initial | ZvL2 PA  |
| Mg1655 initial  | 9.97E-03   | -              | -         | -        | -            | -        |
| Mg1655 PA       | 7.99E-02   | 6.60E-04       | -         | -        | -            | -        |
| ZvL2 Glu        | 3.20E-04   | 4.30E-04       | 3.50E-04  | -        | -            | -        |
| ZvL2 initial    | 1.80E-04   | 1.80E-04       | 1.80E-04  | 3.50E-04 | -            | -        |
| ZvL2 PA         | 3.50E-04   | 3.70E-04       | 3.50E-04  | 6.30E-04 | 3.15E-03     | -        |
| ZvL2 PA-Glu     | 2.31E-01   | 3.04E-01       | 3.27E-02  | 3.20E-04 | 1.80E-04     | 3.50E-04 |

| Macrophages. 6h postinfection |            |                |           |          |              |             |
|-------------------------------|------------|----------------|-----------|----------|--------------|-------------|
|                               | Mg1655 Glu | Mg1655 initial | Mg1655 PA | ZvL2 Glu | ZvL2 initial | ZvL2 PA-Glu |
| Mg1655 initial                | 1.60E-05   | -              | -         | -        | -            | -           |
| Mg1655 PA                     | 5.77E-01   | 3.80E-06       | -         | -        | -            | -           |
| ZvL2 Glu                      | 1.40E-12   | 6.51E-01       | 3.80E-09  | -        | -            | -           |
| ZvL2 initial                  | 1.60E-09   | 2.10E-04       | 2.20E-11  | 1.10E-06 | -            | -           |
| ZvL2 PA-Glu                   | 1.37E-01   | 7.10E-05       | 2.38E-01  | 1.10E-04 | 1.60E-07     | -           |
| ZvL2 PA                       | 7.10E-11   | 1.00E-06       | 1.40E-12  | 8.70E-09 | 8.80E-04     | 3.20E-09    |

| Macrophages. 24h postinfection |            |                |           |          |              |          |
|--------------------------------|------------|----------------|-----------|----------|--------------|----------|
|                                | Mg1655 Glu | Mg1655 initial | Mg1655 PA | ZvL2 Glu | ZvL2 initial | ZvL2 PA  |
| Mg1655 initial                 | 1.20E-06   | -              | -         | -        | -            | -        |
| Mg1655 PA                      | 6.84E-01   | 7.60E-07       | -         | -        | -            | -        |
| ZvL2 Glu                       | 8.40E-08   | 7.08E-01       | 6.50E-08  | -        | -            | -        |
| ZvL2 initial                   | 4.20E-07   | 8.20E-06       | 3.50E-07  | 1.00E-05 | -            | -        |
| ZvL2 PA                        | 3.40E-15   | 1.40E-12       | 2.00E-16  | 7.80E-14 | 2.90E-02     | -        |
| ZvL2 PA-Glu                    | 5.79E-01   | 7.50E-07       | 7.37E-01  | 1.00E-07 | 1.70E-07     | 2.00E-16 |
